# Supplementary material
Source: PubMed Central journal article supplement (PMC1959499)

# Detection of LSKL peptide in 24 hr urines of Sham and DAAC Rats

**Standard Curve of LSKL extracted from urine (50 – 5000 nM)**

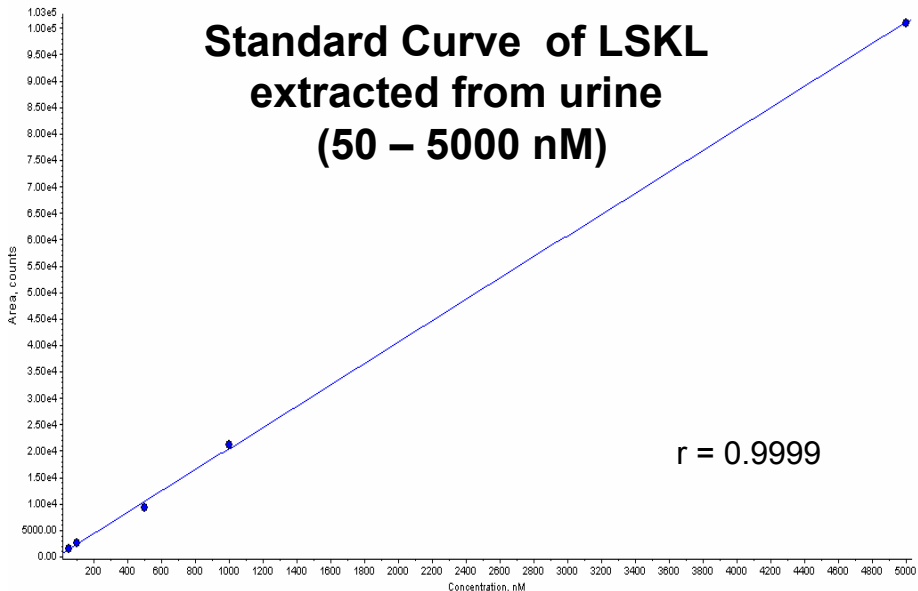

| Animal         | Sample      | Analyte peak area (counts) | Analyte peak height (cps) |
|----------------|-------------|----------------------------|---------------------------|
| 1              | Sham + LSKL | 0                          | 0                         |
| 2              |             | 425                        | 104                       |
| 3              |             | 0                          | 0                         |
| 4              |             | 0                          | 0                         |
| 5              | DAAC + LSKL | 338                        | 84.7                      |
| 6              |             | 71.9                       | 69.3                      |
| 7              |             | 94.3                       | 52.8                      |
| 8              |             | 229                        | 84.5                      |
| Standard Curve | 0           | 0                          | 0                         |
|                | 50 nM       | 1,460                      | 276                       |
|                | 100 nM      | 2,680                      | 315                       |
|                | 500 nM      | 9,360                      | 1,210                     |
|                | 1000 nM     | 21,200                     | 2,440                     |
|                | 5000 nM     | 101,000                    | 11,700                    |

**50 nM LSKL standard extracted from urine**

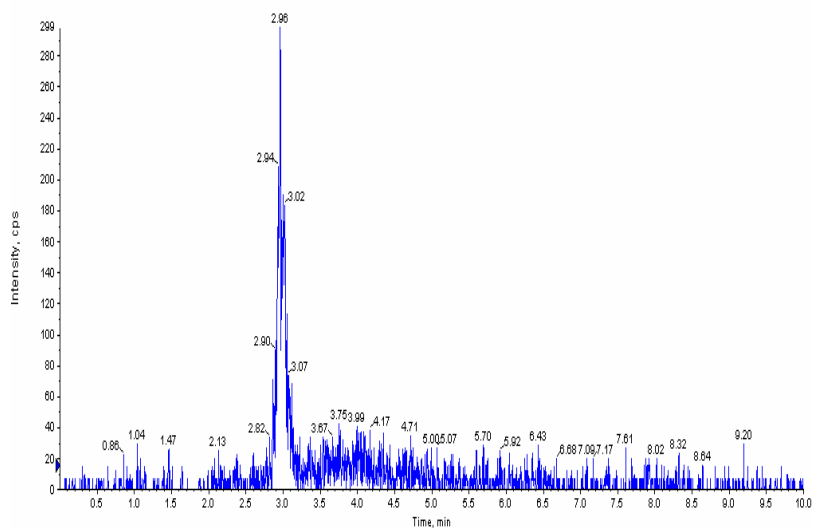

Supplement: amjpathol_ajpath.2007.070056_1.pdf [file amjpathol_ajpath.2007.070056_1.pdf]
